# Supplementary material
Source: PubMed Central journal article supplement (PMC6190695)
Supplement: NIHMS989190-supplement-ESI.pdf [file NIHMS989190-supplement-ESI.pdf]

# Supplementary Information

## Ethane diffusion in mixed linker zeolitic imidazolate framework-7-8 by pulsed field gradient NMR in combination with single crystal IR microscopy

Samuel Berens,<sup>a</sup> Christian Chmelik,<sup>b</sup> Febrian Hillman,<sup>c</sup> Jörg Kärger,<sup>b</sup> Hae-Kwon Jeong,<sup>c</sup> and Sergey Vasenkov\*<sup>a</sup>

<sup>a</sup>Department of Chemical Engineering, University of Florida, Gainesville, FL 32611, United States

<sup>b</sup>Leipzig University, Faculty of Physics and Earth Sciences, Linnéstraße 5, D-04103 Leipzig, Germany

<sup>c</sup>Texas A&M University, Artie McFerrin Dept. of Chem. Eng., College Station, TX 77843, USA

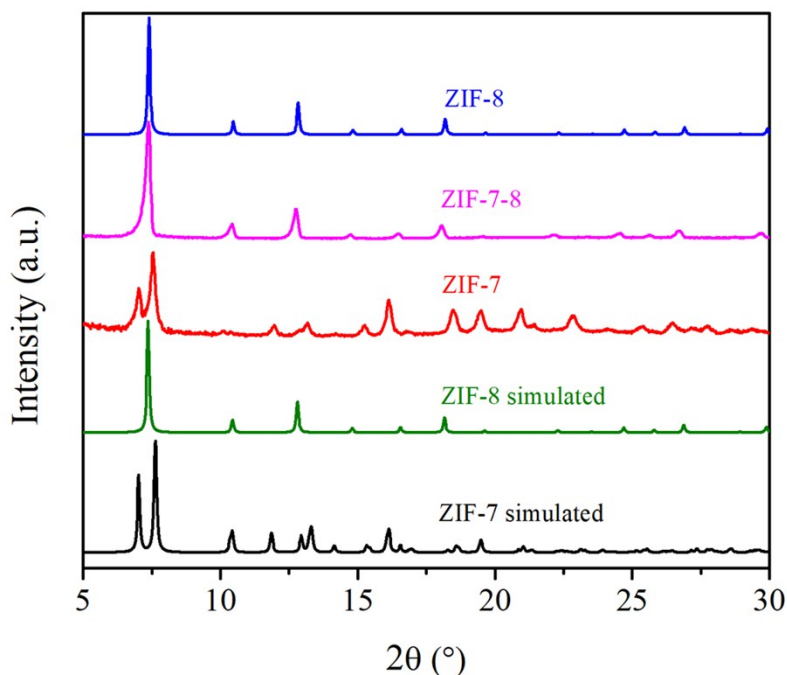

**Figure S1.** Powder X-ray diffraction patterns of ZIF-8, ZIF-7-8, and ZIF-7.

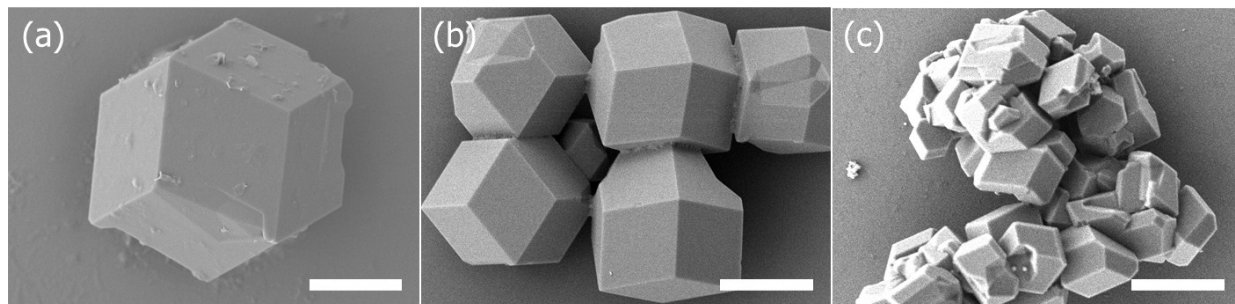

**Figure S2.** SEM images of (a) ZIF-8, (b) ZIF-7-8, and (c) ZIF-7 crystals. Scale bars are 10 μm.

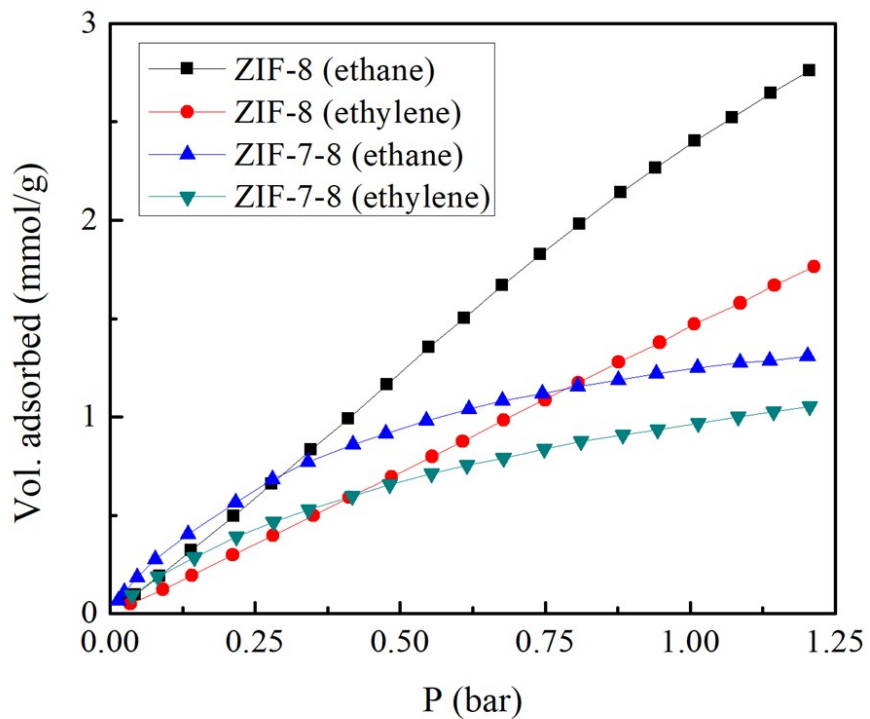

**Figure S3.** Adsorption Isotherms for ethylene and ethane in ZIF-8 and ZIF-7-8 at 296 K.

**Table S1.** Ethane loading pressures, ethane self-diffusion coefficients, root mean squared displacements of ethane\* (RMSD),  $T_1$  and  $T_2$   $^{13}\text{C}$  NMR relaxation times for ethane in ZIF-8 on a 14 T spectrometer.

| Material | Pressure (bar)  | $D$ ( $\times 10^{-11}$ m <sup>2</sup> /s) | RMSD* ( $\mu\text{m}$ ) | $T_1$ (s)       | $T_2$ (ms) |
|----------|-----------------|--------------------------------------------|-------------------------|-----------------|------------|
| ZIF-8    | $7.9 \pm 0.8$   | $2.0 \pm 0.3$                              | $4.2 \pm 0.4$           | $2.0 \pm 0.2$   | $11 \pm 1$ |
| ZIF-8    | $2.7 \pm 0.3$   | $1.7 \pm 0.3$                              | $4.0 \pm 0.4$           | $2.1 \pm 0.2$   | $22 \pm 2$ |
| ZIF-8    | $0.89 \pm 0.09$ | $1.7 \pm 0.3$                              | $4.0 \pm 0.4$           | $1.1 \pm 0.1$   | $19 \pm 2$ |
| ZIF-8    | $0.34 \pm 0.03$ | $1.8 \pm 0.3$                              | $4.1 \pm 0.4$           | $0.94 \pm 0.09$ | $25 \pm 3$ |

\*RMSD reported for measurements at the highest reported diffusion time ( $\Delta$ ) of 160 ms.

**Table S2.** Ethane loading pressures, ethane self-diffusion coefficients, root mean squared displacements of ethane\* (RMSD),  $T_1$  and  $T_2$   $^{13}\text{C}$  NMR relaxation times for ethane in ZIF-7-8 on a 14 T spectrometer.

| Material | Pressure (bar)  | $D_{\text{eff}}$ ( $\times 10^{-12}$ m <sup>2</sup> /s) | RMSD* ( $\mu\text{m}$ ) | $T_1$ (s)     | $T_2$ (ms) |
|----------|-----------------|---------------------------------------------------------|-------------------------|---------------|------------|
| ZIF-7-8  | $7.9 \pm 0.8$   | $6.4 \pm 1.0$                                           | $1.8 \pm 0.2$           | $2.7 \pm 0.3$ | $26 \pm 3$ |
| ZIF-7-8  | $2.7 \pm 0.3$   | $5.1 \pm 0.8$                                           | $1.5 \pm 0.2$           | $3.0 \pm 0.3$ | $29 \pm 3$ |
| ZIF-7-8  | $0.78 \pm 0.08$ | $3.6 \pm 0.5$                                           | $1.3 \pm 0.1$           | $2.2 \pm 0.2$ | $25 \pm 3$ |
| ZIF-7-8  | $0.28 \pm 0.03$ | $3.6 \pm 0.5$                                           | $1.3 \pm 0.1$           | $2.0 \pm 0.2$ | $24 \pm 2$ |

\*RMSD reported for measurements at the highest reported diffusion time ( $\Delta$ ) of 160 ms.

**Table S3.** Band intensities related to ZIF-7 (blm) and ZIF-8 (mlm) obtained by averaging the IR signals at 3115 and 3060  $\text{cm}^{-1}$  and 4100, 2700 and 2475  $\text{cm}^{-1}$ , respectively. Assuming an averaged mlm content of 87%, the variation of the blm-fraction among the crystals is estimated. Maximum and minimum fraction ratios are shown highlighted in orange and blue, respectively.

| crystal number  | Relative ZIF-7 band intensity | Relative ZIF-8 band intensity | ZIF-7/ZIF-8 ratio (relative signals) | ZIF-7 (blm) fraction (%) | ZIF-8 (mlm) fraction (%) |
|-----------------|-------------------------------|-------------------------------|--------------------------------------|--------------------------|--------------------------|
| 1               | 0.0964                        | 0.1415                        | 0.68                                 | 12*                      | 88*                      |
| 2               | 0.1025                        | 0.1508                        | 0.68                                 | 12                       | 88                       |
| 3               | 0.3072                        | 0.5337                        | 0.58                                 | 11                       | 89                       |
| 4               | 0.0329                        | 0.0301                        | 1.09                                 | 18                       | 82                       |
| 5               | 0.0333                        | 0.0340                        | 0.98                                 | 17                       | 83                       |
| 6               | 0.0382                        | 0.0451                        | 0.85                                 | 15                       | 85                       |
| 7               | 0.0169                        | 0.0238                        | 0.71                                 | 13                       | 87                       |
| 8               | 0.0319                        | 0.0380                        | 0.84                                 | 15                       | 85                       |
| 9               | 0.0268                        | 0.0478                        | 0.56                                 | 10                       | 90                       |
| 10              | 0.1415                        | 0.2018                        | 0.70                                 | 13                       | 87                       |
| 11              | 0.2734                        | 0.4048                        | 0.68                                 | 12                       | 88                       |
| 12              | 0.0423                        | 0.0545                        | 0.78                                 | 14                       | 86                       |
| 13              | 0.0884                        | 0.0959                        | 0.92                                 | 16                       | 84                       |
| 14              | 0.0887                        | 0.0839                        | 1.06                                 | 18                       | 82                       |
| 15              | 0.1529                        | 0.2536                        | 0.60                                 | 11                       | 89                       |
| 16              | 0.1631                        | 0.2803                        | 0.58                                 | 11                       | 89                       |
| 17              | 0.0865                        | 0.1439                        | 0.60                                 | 11                       | 89                       |
| 18              | 0.0395                        | 0.0673                        | 0.59                                 | 11                       | 89                       |
| 19              | 0.0600                        | 0.0747                        | 0.80                                 | 14                       | 86                       |
| 20              | 0.0206                        | 0.0433                        | 0.48                                 | 9                        | 91                       |
| 21              | 0.1571                        | 0.2513                        | 0.63                                 | 11                       | 89                       |
| <i>average:</i> |                               |                               |                                      | 13                       | 87                       |

\*all normalized mlm and blm fractions displayed in these columns have an uncertainty of  $\pm 10\%$

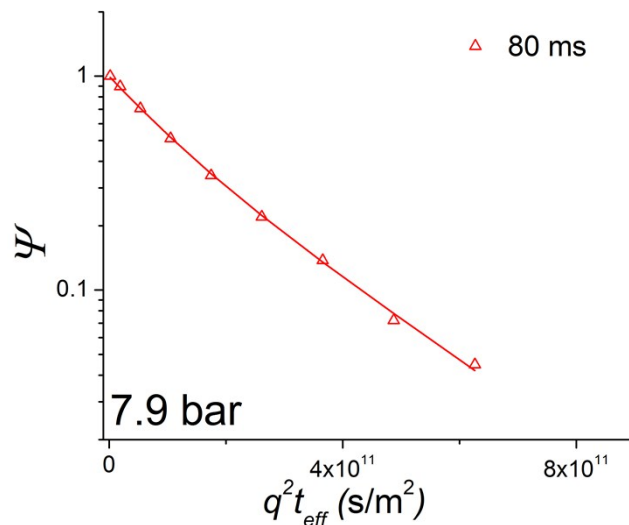

**Figure S4.** An example of  $^{13}\text{C}$  PFG NMR attenuation curve measured for high loading pressure ( $7.9 \pm 0.8$  bar) of ethane in ZIF-7-8 at 296 K on the 14 T spectrometer. The solid red line represents a biexponential fit using Eq. S1 to the data.

$$\Psi = p_1 \exp(-q^2 D_1 t_{\text{eff}}) + p_2 \exp(-q^2 D_2 t_{\text{eff}}) \quad \text{Eq. S1}$$

Equation S1 represents a biexponential PFG NMR attenuation function that would apply given two molecular ensembles with different diffusivities in a measured sample.  $p_1$  and  $p_2$  represent the fractions of the diffusion ensembles.  $D_1$  and  $D_2$  are the corresponding diffusivities of the ensembles. Table S4 shows the best fit values obtained by fitting the curve in Fig. S4 using Eq. S1.

**Table S4.** Results of a biexponential fit (Eq. S1) for ethane in ZIF-7-8 at 7.9 bar

| Diffusion Time | $p_1$ | $D_1 (\times 10^{-12} \text{ m}^2/\text{s})$ | $p_2$ | $D_2 (\times 10^{-12} \text{ m}^2/\text{s})$ |
|----------------|-------|----------------------------------------------|-------|----------------------------------------------|
| 80 ms          | 0.39  | 11                                           | 0.61  | 4.3                                          |
